1 **E3 ligase TRIM47 positively regulates endothelial activation and pulmonary**  
2 **inflammation through potentiating the K63-linked ubiquitination**

3

4 Yisong Qian<sup>1,2</sup>, Ziwei Wang<sup>1</sup>, Hongru Lin<sup>1</sup>, Tianhua Lei<sup>2</sup>, Zhou Zhou<sup>2</sup>, Weilu Huang<sup>1</sup>,  
5 Xuehan Wu<sup>1</sup>, Li Zuo<sup>1</sup>, Jie Wu<sup>1</sup>, Yu Liu<sup>1</sup>, Ling-Fang Wang<sup>1</sup>, Xiao-Hui Guan<sup>1</sup>, Ke-Yu Deng<sup>1</sup>,  
6 Mingui Fu<sup>2,\*</sup>, Hong-Bo Xin<sup>1,\*</sup>

7

8 <sup>1</sup> The National Engineering Research Center for Bioengineering Drugs and the Technologies,  
9 Institute of Translational Medicine, Nanchang University, 1299 Xuefu Rd, Honggu District,  
10 Nanchang 330031, China

11 <sup>2</sup> Department of Biomedical Science, School of Medicine, University of Missouri Kansas  
12 City, 2411 Holmes Street, Kansas City, MO 64108, USA

13

14 \*Correspondence: Hong-Bo Xin, The National Engineering Research Center for  
15 Bioengineering Drugs and the Technologies, Institute of Translational Medicine, Nanchang  
16 University, 1299 Xuefu Rd, Honggu District, Nanchang 330031, China. Tel:  
17 86-791-83827165; E-mail: xinhb@ncu.edu.cn.

18 Mingui Fu, Shock/Trauma Research Center & Department of Basic Medical Science, School  
19 of Medicine, University of Missouri Kansas City, MO 64108. Tel: 816-235-2193; Fax:  
20 816-235-6444; E-mail: fum@umkc.edu.

21

22

23 **Abstract**

24 Endothelial activation plays an essential role in the pathology of sepsis-induced acute lung  
25 injury, but the detailed regulatory mechanisms remain largely unknown. Here, we  
26 demonstrated that TRIM47, an ubiquitin E3 ligase of tripartite protein family, is highly  
27 expressed in vascular endothelial cells and is up-regulated during TNF $\alpha$ -induced endothelial  
28 activation. Knockdown of TRIM47 in endothelial cells prevents the transcription of multiple  
29 pro-inflammatory cytokines, reduces monocyte adhesion and the expression of adhesion  
30 molecules, and inhibits the secretion of IL-1 $\beta$  and IL-6 into the supernatant. By contrast,  
31 overexpression of TRIM47 promotes inflammatory response and monocyte adhesion upon  
32 TNF $\alpha$  stimulation. TRIM47 modulates the activation of NF- $\kappa$ B and MAPK signaling  
33 pathways during endothelial activation. Further experiment confirmed that TRIM47 interacts  
34 with TRAF2 and mediates K63-linked ubiquitination. In addition, TRIM47-deficient mice are  
35 more resistant to lipopolysaccharide-induced acute lung injury and death, due to attenuated  
36 pulmonary inflammation. Taken together, our studies suggest that TRIM47 promotes  
37 pulmonary inflammation and injury at least partly through potentiating the K63-linked  
38 ubiquitination of TRAF2, which in turn activates NF- $\kappa$ B and MAPK signaling pathways to  
39 trigger inflammatory response in endothelial cells.

40 **Keywords:** TRIM47; endothelial cells; inflammatory response; ubiquitination; acute lung  
41 injury

42

## 43 **Introduction**

44 Acute Lung injury (ALI) comprise a uniform response of the lung to inflammatory or  
45 chemical insults and is therefore commonly generated by systemic illness including sepsis or  
46 trauma, infection with pathogens and toxic gas inhalation<sup>1</sup>. Despite a great deal of effort has  
47 been devoted to target the immune response to infection and adjunct approaches, there are  
48 few effective therapeutic strategies due to the emergence of new pathogens such as the global  
49 pandemic of novel coronavirus pneumonia, as well as the continued rise of drug resistance<sup>2</sup>.

50 The pulmonary endothelium is critically implicated in the pathogenesis of ALI as a main  
51 target of circulating cells and humoral mediators under injury<sup>1</sup>. The interaction between  
52 endothelial cells and leukocytes is a key step in the development of ALI. Leukocyte adhesion  
53 to endothelial cells and migration across endothelial cells are mediated by the interaction of  
54 complementary adhesion molecules on leukocytes and endothelial cells. The increased  
55 expression or release of endothelial cell adhesion molecules is a hallmark of endothelial cell  
56 activation<sup>3,4</sup>. Upon the access of leukocytes into the lung parenchyma, they can release  
57 inflammatory mediators to destroy pathogens, but the over-activated immune response have  
58 potential to result in the imbalance of the pro-inflammatory and anti-inflammatory  
59 mechanisms, triggering "cytokine storm" and subsequent tissue damage<sup>2,5</sup>. Considering the  
60 critical role of endothelial response during ALI, strategies that targeting endothelial  
61 components, including cell surface receptors<sup>6</sup>, signaling pathways, transcriptional networks,  
62 and endothelial cell gene products, have been recently proposed to attenuate endothelial  
63 activation and improve endothelial dysfunction<sup>7</sup>.

64 Tripartite motif-containing (TRIM) proteins, a subfamily of E3 ubiquitin ligases, have  
65 been widely involved in many physiological processes including cell proliferation and  
66 differentiation, innate immunity and autophagy<sup>8</sup>. Multiple TRIM proteins have been found to  
67 participate in innate immunity through positive or negative regulation of cytokines, toll like  
68 receptors, pattern recognition receptors, intracellular signaling pathways and transcription  
69 factors<sup>9</sup>. Numerous studies have focused on the roles and regulatory mechanisms of TRIM in  
70 immune cells<sup>10-14</sup>, there are relatively few studies on TRIM proteins involved in the  
71 regulation of endothelial inflammation. It has been shown that TRIM28 is abundant in  
72 endothelial cells, and interfering with TRIM28 expression has anti-inflammatory and  
73 anti-angiogenic phenotypes<sup>15</sup>. However, the precise roles of TRIM family members in  
74 regulating of endothelial function remain largely unknown.

75 TRIM47 was originally found in brain astrocytomas and was named GOA (gene  
76 overexpressed in astrocytoma). It is prominently located in nucleus and its LXXLL motifs are  
77 thought to be closely related to nuclear receptor binding<sup>16</sup>. Emerging evidence showed that  
78 TRIM47 have functions on tumorigenesis and progression<sup>17-19</sup>, viral resistance processes<sup>20</sup>,  
79 and cerebral ischemia-reperfusion injury<sup>21</sup>. A recent genome-wide association study showed  
80 that the SNPs of TRIM47 and TRIM65, located in the adjacent position of human  
81 chromosome 17, are closely related to white matter hyperintensities, which are thought to  
82 reflect ischemic damage to the small deep cerebral vessels<sup>22</sup>. These findings suggested that  
83 TRIM47 and TRIM65 may coordinately or independently participate in the regulation of  
84 cerebrovascular injury. Our previous work demonstrated that TRIM65, as an E3 ubiquitin  
85 ligase, selectively targets VCAM-1 and promote its ubiquitination and degradation, thus  
86 reducing lung inflammation and damage caused by sepsis<sup>23</sup>, but the role of TRIM47 in

87 endothelial inflammation remains to be elucidated.

88 In the present study, we investigate the effects of TRIM47 in endothelial activation in an  
89 *in vitro* model of inflammation induced by TNF $\alpha$ . The global TRIM47 knockout mice was  
90 constructed to confirm its role in ALI. The E3 ubiquitin ligase activity and substrate  
91 molecules of TRIM47, as well as the signaling pathways involved were also explored.

92

## 93 **Materials and methods**

### 94 **Reagents**

95 Human recombinant TNF $\alpha$  and LPS (from *Escherichia coli* O111:B4) were purchased from  
96 Sigma. VCAM-1 (sc-13160), ICAM-1 (sc-1511-R),  $\beta$ -actin (sc-47778), Histone H2A  
97 (sc-10807) antibodies were from Santa Cruz Biotechnology. TRIM47 antibody (26885-1-AP)  
98 was purchased from Proteintech. Phospho-p65 (3033), p65 (8242), I $\kappa$ B $\alpha$  (4812),  
99 phospho-I $\kappa$ B $\alpha$  (2859), phospho-IKK $\alpha$ / $\beta$  (2078), IKK $\alpha$  (11930), IKK $\beta$  (8943), phospho-JNK  
100 (4668), JNK (9252), phospho-ERK1/2 (4370), ERK1/2 (4695), phospho-p38 (4511), p38  
101 (8690), Flag (8146 and 2368) and  $\alpha$ -tubulin (2125) antibodies were purchased from Cell  
102 Signaling Technology. Ubiquitin (ab7780), ubiquitin (K48, ab140601), and ubiquitin (K63,  
103 ab179434) antibodies were purchased from Abcam.

104

### 105 **Cell culture, infection and treatment**

106 Human Umbilical Vein Endothelial Cells (HUVEC) and THP-1 cells were purchased from  
107 Lonza Walkersville Inc. HUVECs were cultured in EGM medium according to the  
108 manufacturer instruction, and used for experiment in less than eight passages. THP-1 was  
109 cultured in RPMI-1640 medium supplemented with 10% FBS and 2-mercaptoethanol to a  
110 final concentration of 0.05 mM. RAW264.7, EA.hy926, bEnd.3, and HEK293 cells were  
111 purchased from ATCC and cultured in DMEM supplemented with 10% FBS. U251, HeLa,  
112 MDA-MB-23, 3T3-L1 and A549 cell lines were from National Collection of Authenticated  
113 Cell Cultures (Shanghai, China) and cultured in DMEM supplemented with 10% FBS. The  
114 hCMEC/D3 cell line was purchased from BeNa Culture Collection (Beijing, China) and  
115 cultured in RPMI-1640 medium supplemented with 10% FBS. HL-1 cardiac muscle cell line  
116 was obtained from Sigma Aldrich and cultured in Claycomb medium supplemented with 100  
117  $\mu$ M norepinephrine, 4 mM l-glutamine and 10% FBS. The siRNA target sequence was  
118 selected in Human TRIM47 gene (GenBank accession NM\_033452.2) as follows: siRNA1:  
119 5'-TGAAGCTCCCAGGGACTATTT-3', and siRNA2:  
120 5'-TACTGGGAGGTGGAGATTATC-3'. TRIM47 siRNA was constructed into the lentivirus  
121 expression vector pLV[shRNA]-EGFP:T2A:Puro-U6. A universal sequence was used as a  
122 negative control for RNA interference. Human TRIM47 gene was constructed into  
123 pLV[Exp]-EGFP:T2A:Puro-EF1A vector to obtain the expression lentiviral vector. The viral  
124 particles were produced by third generation packaging in 293T cells and Lentiviral stocks  
125 were concentrated using ultracentrifugation. HUVECs ( $5 \times 10^4$ /ml) were prepared and  
126 infected at a Multiplicity of Infection (MOI) of 50 with negative control, TRIM47 siRNA1,  
127 TRIM47 siRNA2 or TRIM47 overexpression lentiviruses for 16 h at 37°C in the presence of  
128 10 mg/ml polybrene. The cultures were then washed and cultured in fresh medium for 72 h.  
129 GFP expression was detected to calculate the infection efficiency. Then, cells were treated  
130 with 10 ng/ml TNF $\alpha$  for indicated times, and mRNAs or proteins from those cells were

131 extracted and detected.

132

### 133 **RNA isolation and QPCR**

134 Total tissue or cellular RNA was isolated using TRIzol reagents, according to the  
135 manufacturer's instructions (Life Technologies, CA, USA). One microgramme of total RNA  
136 was reverse-transcribed using a One Step PrimeScript™ RT-PCR Kit (Takara, Liaoning,  
137 China) with a thermocycler. The mRNA levels were determined by SYBR Green dye using  
138 an ABI 7500 sequence detection system with a reaction mixture that consisted of SYBR  
139 Green 2×PCR Master Mix (Applied Biosystems, CA, USA), cDNA template, and the forward  
140 and reverse primers. Primer sequences are listed in Table S1. The PCR protocol consisted of  
141 40 cycles of denaturation at 95 °C for 15 s followed by 60 °C for 1 min to allow extension  
142 and amplification of the target sequence. Data were analyzed using ABI 7500 sequence  
143 detection system software. The amount of mRNA was normalized to GAPDH using the  
144  $2^{-\Delta\Delta CT}$  method. The results were from three independent experiments performed in triplicate.

145

### 146 **Protein isolation and western blot**

147 Tissue extracts and whole-cell lysates were prepared in radioimmunoprecipitation assay  
148 buffer (Thermo Scientific) supplemented with 1 mM PMSF. Nuclear and cytoplasmic protein  
149 fractions from cells were extracted by Nuclear-Cytosol Extraction Kit (Applygen  
150 Technologies Inc, Beijing, China), according to the manufacturer's instructions. Fifty  
151 micrograms protein per sample was loaded in each lane and separated by sodium dodecyl  
152 sulfate-polyacrylamide gel electrophoresis (SDS-PAGE) and transferred to nitrocellulose  
153 membranes (Pall Corporation, USA) in Tris-glycine buffer (48 mM Tris, 39 mM glycine, pH  
154 9.2) containing 20% methanol. The membranes were blocked with skimmed milk for 1 h,  
155 washed in Tris buffered saline containing 0.1% Tween-20 (TBST), and incubated with  
156 primary antibodies overnight at 4 °C. After washing in TBST for three times, nitrocellulose  
157 membranes were incubated for 1 h at room temperature with the horseradish peroxidase  
158 conjugated IgG (1:5000; Santa Cruz Biotechnology, Inc, CA, USA). The bands were  
159 visualized by the SuperSignal West Pico Chemiluminescent Substrate Trial Kit (Pierce,  
160 Rockford, IL, USA). The immunodetected protein bands were then analyzed using  
161 ChemiDoc XRS system with Quantity One software (Bio-Rad, Richmond, CA, USA).

162

### 163 **Immunocytochemistry**

164 At the end of the treatment, cells were rinsed with phosphate-buffered saline (PBS) three  
165 times, fixed with 4% paraformaldehyde for 30 min at room temperature and permeabilised in  
166 0.1% Triton X-100 for 10 min. An incubation in 5% bovine serum albumin (BSA) in PBS for  
167 1 h was performed to prevent antibody non-specific binding. The cultures were incubated  
168 with primary antibodies overnight at 4 °C. After incubation with primary antibodies, cells  
169 were incubated with fluorescein isothiocyanate (FITC)-conjugated goat anti-rabbit IgG  
170 (Alexa 488; 1:1000; invitrogen) and the nuclei were stained with DAPI. Immunostained cells  
171 were examined under a fluorescence microscope (Olympus IX71, Tokyo, Japan).

172

### 173 **Ubiquitination assay with Co-IP**

174 HUVECs were transfected with Flag-tagged TRIM47 plasmid or empty vector using

175 electroporation. The protease inhibitor MG132 (10 mM; Sigma-Aldrich) was added 4 h  
176 before harvest. At 24 h posttransfection, cells were lysed in CelLytic M Cell lysis buffer with  
177 protease inhibitors, phosphatase inhibitors, NEM, and ubiquitin aldehyde. For endogenous IP,  
178 HUVECs were harvested after 15 min-TNF $\alpha$  (10 ng/mL) exposure. The immune complexes  
179 were collected by incubation (2 h, 4°C) with protein G-agarose (Sigma). Co-IP assays were  
180 performed by using Pierce<sup>TM</sup> Protein G Agarose (Thermo Fisher) followed the  
181 manufacturer's instruction. After extensive washing, the electrophoresis loading buffer was  
182 added to the complexes and incubated for 5 minutes at 95°C. Immunoprecipitated proteins  
183 were resolved by SDS-PAGE and analyzed by immunoblotting with indicated antibodies.

184

### 185 **Generation of TRIM47 knockout mice**

186 To define the physiological role of TRIM47 in vivo, we have obtained the mice with  
187 heterozygous TRIM47-targeted allele by using CRISPR/Cas9 to remove all exons of TRIM47  
188 gene (Fig. 5A). The mice with homozygous TRIM47-targeted alleles were generated by  
189 interbreeding. The mice were created in C57BL/6 background. Genotyping was done with the  
190 following primers: Trim47-F: 5'-GGTAAACACAGTCGCTAAGAGGTCAA-3', Trim47-R:  
191 5'-TGGTCTAGGGATGCCAGGGTTCT-3' and Trim47-Wt/He-F:  
192 5'-AGTCAGAGTGAGCAGGCAGGAGAATA-3' (Fig. 5B). Wild type and TRIM47  
193 knockout mice were housed in the Animal Centre of Institute of Translational Medicine,  
194 Nanchang University, with a 12 h light-dark cycle, optimal temperature and humidity, filtered  
195 water, and appropriate nutrient feed. All procedures related to the care of animals were  
196 performed according to the National Institutes of Health Guide for the Care and Use of  
197 Laboratory Animals. All experimental protocols were approved by Institutional Animal Care  
198 and use Committee of Nanchang University. The lung tissue extracts were examined by  
199 western blot analysis and the results showed that TRIM47 protein was abolished in the  
200 homozygous targeted allele (Fig. 5C), which generated the global knockout mouse  
201 (designated as TRIM47<sup>-/-</sup>).

202

### 203 **LPS challenge in mice**

204 Age-matched mice (7-9 weeks) were randomly assigned to control or experimental groups.  
205 Wild type and TRIM47<sup>-/-</sup> mice underwent an intraperitoneal injection of LPS (15 mg/kg) to  
206 induce lethal endotoxic shock. The control group received injections of the equivalent  
207 volume of 0.9% NaCl solution. After injection, the mice were closely monitored for general  
208 condition and survival for 7 days.

209

### 210 **Measurements of inflammatory cytokines**

211 The concentrations of TNF $\alpha$ , IL-1 $\beta$  and IL-6 in the serum, and IL-1 $\beta$  and IL-6 levels in the  
212 supernatant of HUVECs were measured using the specific ELISA kits according to the  
213 manufacturer's instructions (Neobioscience Technology Co., Ltd., Shenzhen, China).  
214 Absorbance at 450 nm wave length was measured, and the protein concentration was  
215 determined by interpolation on to absorbance curves generated by recombinant protein  
216 standards using iMark<sup>TM</sup> Microplate Absorbance Reader (Bio-Rad).

217

### 218 **Histological analysis**

219 The right upper lungs were removed after 24 h of LPS challenge and were fixed in 4%  
220 phosphate-buffered paraformaldehyde. The 4- $\mu$ m paraffin tissue sections were cut and stained  
221 with H&E as previously described<sup>24</sup>. Photomicrographs were taken by a light microscope  
222 (Olympus BX51). Lung injury was evaluated by an independent pathologist who was blinded  
223 to the grouping, taking into account haemorrhage in the lung tissue, alveolar congestion,  
224 edema, infiltration of macrophages and neutrophils, and morphological changes in the  
225 alveolar wall.

226

### 227 **Measurement of lung wet/dry weight ratio**

228 To evaluate the magnitude of pulmonary edema, the wet-to-dry weight ratios at 24 h after  
229 LPS challenge were determined. The left lung tissue samples were weighed immediately after  
230 removal (wet weight) and then subjected to desiccation in an oven at 50 °C until a stable dry  
231 weight was achieved after 72 h. The ratio of the wet/dry weight was then calculated.

232

### 233 **Statistics**

234 Statistical analysis was performed with GraphPad Prism software (GraphPad, San Diego,  
235 CA). Data were expressed as mean  $\pm$  SD. For comparison between two groups, the unpaired  
236 Student's t-test was used. For multiple comparison, one way ANOVA followed by Turkey's  
237 post hoc analysis was used. A value of  $p < 0.05$  was considered significant.

238

### 239 **Results**

#### 240 **TRIM47 is highly expressed in vascular endothelial cells**

241 The mRNA and protein levels of TRIM47 were detected in various tissues of mice. Results  
242 showed that TRIM47 mRNA was highly expressed in heart, lung, kidney and epididymal  
243 white adipose tissue (eWAT, Fig. 1A). TRIM47 protein levels were abundant in heart, lung,  
244 stomach and testis (Fig. 1B). The immunohistochemistry demonstrated that TRIM47 had a  
245 high expression in lung, kidney tubules, heart and eWAT, moderate expression in brain,  
246 stomach, skin and colon, and low expression in liver, testis, spleen and thymus (Fig. S1). In  
247 particular, an obvious positive staining was observed in the vascular lining of multiple tissues,  
248 as indicated by the arrows, including lung, brain, subcutaneous tissue and colon (Fig. 1C).  
249 Next, we detected TRIM47 expression in different cells. Real-time PCR and western blot  
250 results revealed that TRIM47 was specifically expressed in human umbilical vein endothelial  
251 cells (HUVEC and EA.hy926) and brain microvascular endothelial cells (bEnd.3), whereas  
252 TRIM47 showed low expression in monocyte/macrophages (Fig. 1D and 1E). In addition, we  
253 measured the mRNA levels of 56 TRIM family members in HUVECs and hCMECs,  
254 respectively. TRIM47 exhibited a moderate expression in both cells (Fig. 1F and 1G). These  
255 results suggested that TRIM47 is highly expressed in vascular endothelial cells.

256

#### 257 **TRIM47 is induced by inflammatory stimulation in endothelial cells**

258 We further investigated the expression changes of TRIM47 following exogenous stimuli.  
259 Result showed that the mRNA and protein levels of TRIM47 were significantly up-regulated  
260 by LPS, H<sub>2</sub>O<sub>2</sub> and TNF $\alpha$  (Fig. 2A-C). The expression of TRIM47 was increased since 2 h  
261 after TNF $\alpha$  stimulation and peaked at 12 h (Fig. 2C). Similarly, TRIM47 expression was also  
262 up-regulated after TNF $\alpha$  challenge in bEnd.3 cells upon various stimulation, including

263 inflammation and hypoxia (Fig. S2A-D). However, TRIM47 was not sensitive to TNF $\alpha$   
264 challenge but remarkably decreased by LPS exposure in macrophages (Fig. S2E-H). The  
265 localization of TRIM47 was measured by western blot in cytosolic and nuclear fractions,  
266 respectively. The nucleus contains a prominent proportion of TRIM47, which was  
267 significantly up-regulated after TNF $\alpha$  exposure. The cytosolic TRIM47 was also induced  
268 after TNF $\alpha$  stimulation (Fig. 2D). The immunocytochemistry further confirmed that TRIM47  
269 mainly but not solely located in the nucleus of HUVECs. One-hour stimulation of TNF $\alpha$   
270 resulted in an increase in fluorescence density, which was partly resumed at 8 h of TNF $\alpha$   
271 exposure (Fig. 2E). TRIM47 also responded to LPS challenge in HUVECs (Fig. S3A), and  
272 was up-regulated in hCMEC/D3 following TNF $\alpha$  and LPS incubation (Fig. S3B and S3C).  
273 The expression profile of TRIM47 indicated that it may play a role during inflammatory  
274 stimulation.

275

### 276 **TRIM47 promotes TNF $\alpha$ -induced endothelial activation**

277 The siRNA and overexpression vectors were introduced to explore the role of TRIM47 in  
278 endothelial activation. Knockdown of TRIM47 significantly reduced TNF $\alpha$ -induced mRNA  
279 expression of multiple adhesion molecules and pro-inflammatory cytokines (Fig. 3A), which  
280 were elevated in TRIM47-overexpressed HUVECs. TRIM47 siRNAs obviously decreased  
281 the protein levels of ICAM-1 and VCAM-1, and suppressed THP-1 adhesion to HUVECs,  
282 whereas overexpression of TRIM47 had opposite effects (Fig. 3C and 3D). TRIM47 siRNAs  
283 also suppressed the secretion of pro-inflammatory cytokines IL-1 $\beta$  and IL-6 into the  
284 supernatant (Fig. 3E and 3F). By contrast, overexpression of TRIM47 promotes the  
285 production of pro-inflammatory cytokines (Fig. 3G and 3H). In addition, knockdown of  
286 TRIM47 remarkably inhibited cell proliferation and migration induced by TNF $\alpha$  in HUVECs  
287 (Fig. S4). These results suggested that TRIM47 is a positive regulator of endothelial  
288 activation.

289

### 290 **TRIM47 modulates NF- $\kappa$ B and MAPK pro-inflammatory signaling pathways**

291 The potential signaling pathway involved in TRIM47-mediated endothelial activation was  
292 investigated, including NF- $\kappa$ B and MAPK. Results showed that knockdown of TRIM47  
293 significantly inhibited the phosphorylation of I $\kappa$ B $\alpha$ , IKK $\alpha$ / $\beta$  and p65 subunit, and prevented  
294 the degradation of I $\kappa$ B $\alpha$  (Fig. 4A), whereas overexpression of TRIM47 promotes the  
295 activation of NF- $\kappa$ B signaling pathway (Fig. 4B). TRIM47 siRNAs also suppressed the  
296 activation of JNK and p38 MAPK signal pathways but had no obvious effect on ERK (Fig.  
297 4C). Overexpression of TRIM47 further activated JNK and p38 signal pathways after TNF $\alpha$   
298 stimulation (Fig. 4D). These results suggested that TRIM47 mediates endothelial activation at  
299 least partly through NF- $\kappa$ B and MAPK activation.

300

### 301 **TRIM47 mediates K63-linked Ubiquitylation and interacts with TRAF2**

302 Emerging evidence showed that TRIM proteins mediated K48- or K63-linked  
303 ubiquitination to activate NF- $\kappa$ B signaling pathway in response to exogenous stimulation<sup>12, 25</sup>.  
304 Therefore, the ubiquitination pattern of TRIM47 involved in endothelial activation was  
305 analyzed. We observed that TNF- $\alpha$  induced total ubiquitination and K63-linked ubiquitination  
306 of TRIM47 in HUVECs by Co-immunoprecipitation with the TRIM47 antibody (Fig. 5A).



307 HUVECs were transfected with Flag or Flag-TRIM47 vector for 48 h.  
308 Co-immunoprecipitation was performed with the Flag antibody. The exogenous assay further  
309 confirmed that TRIM47 was involved in K63-linked ubiquitination rather than K48 (Fig. 5B).  
310 Tumor necrosis factor receptor-associated factor 2 (TRAF2) is a key adaptor molecule in  
311 TNFR signaling complexes that promotes downstream signaling cascades, such as NF- $\kappa$ B  
312 and MAPK activation<sup>26</sup>, whereas TRAF6 is the major transducer of IL-1 receptor/TLR  
313 signaling<sup>27</sup>. It has been reported that the K63-linked polyubiquitin chains could be attached  
314 to TRAF2, serving as a scaffold to recruit TAK1, TAB1, and TAB2. The active TAK1 further  
315 phosphorylates the MAPKs and IKK complex to initiate MAPK and NF- $\kappa$ B cascades<sup>28</sup>. We  
316 therefore examined the possible binding proteins of TRIM47 involved in this signal pathway.  
317 As shown in Fig. 5C, TRIM47 bind with TRAF2 but not TRAF6. TRIM47 did not interact  
318 with the downstream proteins including TAK1, IKK $\gamma$  and I $\kappa$ B $\alpha$ . In addition, TRIM47 did not  
319 induce the degradation of I $\kappa$ B $\alpha$ , a classical target of K48-linked ubiquitination (Fig. S5).  
320 These results suggest that TRIM47 regulated NF- $\kappa$ B and MAPK activation by enhancing the  
321 K63-linked ubiquitination of TRAF2.

322

### 323 **TRIM47 deficiency alleviates acute lung injury and inflammatory response in** 324 **LPS-challenged mice**

325 We produced the global TRIM47 knockout mice to investigate its role in systemic  
326 inflammatory response and organ injury (Fig 6A-C). The TRIM47 KO mice had no  
327 significant changes in viscera index (Table. S2) or histology (Fig. S6) compared with the WT  
328 mice. After 24 h of LPS injection, the TRIM47 KO mice showed reduced pulmonary edema  
329 compared with the WT animals (Fig. 6D). In addition, TRIM47 deficiency improved the  
330 survival rate of mice after LPS challenge (Fig. 6E). HE staining showed that there were no  
331 significant differences in lung histology between WT and TRIM47 KO mice under normal  
332 conditions. A significant tissue damage appeared in the lungs of WT mice, including  
333 neutrophil infiltration, alveolar wall thickening, hemorrhage, alveolar edema and alveolar  
334 disruption. The histological changes were significantly alleviated in TRIM47 KO mice (Fig.  
335 6F).

336 TRIM47 and various pro-inflammatory cytokines in the lung and serum were measured  
337 after 6 h and 24 h following LPS injection, respectively. The mRNA levels of  
338 pro-inflammatory cytokines were much lower in TRIM47 KO mice than that in WT mice  
339 (Fig. 6G). The knockout mice also had lower levels of TNF $\alpha$ , IL-1 $\beta$  and IL-6 content in the  
340 serum (Fig. 6H). These results indicated that TRIM47 deficiency attenuates systemic  
341 inflammatory and acute lung injury during LPS challenge.

342

### 343 **Discussion**

344 Here we demonstrated that TRIM47 play crucial roles in TNF $\alpha$ -induced endothelial  
345 activation. As a potential E3 ubiquitin ligase, TRIM47 interacts with TRAF2 and mediates  
346 K63-linked ubiquitination, activating NF- $\kappa$ B and MAPK signaling pathways. In LPS  
347 challenged mice, TRIM47 deficiency significantly reduced pulmonary inflammation and  
348 tissue damage. These results strongly suggested that TRIM47 is a positive regulator of  
349 endothelial activation.

350 TRIM47 was originally found to be overexpressed in astrocytoma tumor cells and

351 astrocytes of fetal brain, with prominent nuclear staining, but virtual absence in mature  
352 astrocytes. The mRNA levels of TRIM47 in normal tissues were low except for in kidney<sup>16</sup>.  
353 Here we showed that TRIM47 has relatively high expression in heart, lung, kidney and eWAT  
354 by detecting the mRNA and protein levels respectively. The immunohistochemistry also  
355 demonstrated its extensive distribution in these tissues. Interestingly, the vascular endothelial  
356 cells from different tissues exhibited remarkable positive staining of TRIM47. The samples  
357 from cell cultures further confirmed its prominent expression in various endothelial cells.  
358 Therefore TRIM47 may be identified as a specifically expressed protein in endothelial cells  
359 where may take its functions.

360 A various TRIM proteins have been proved to be implicated in innate immunity and  
361 inflammatory response. Our previous work showed that TRIM47 is down-regulated upon  
362 TNF $\alpha$  exposure in THP1-derived macrophages<sup>29</sup>. According to the present study, TRIM47  
363 was significantly induced by multiple stimuli, including TNF $\alpha$ , LPS, hypoxia and oxidative  
364 stress in endothelial cells, indicating that TRIM47 may be a sensor in response to exogenous  
365 stimulation. In agreement with the previous report<sup>16</sup>, we found that TRIM47 was prominent  
366 located in the nucleus of HUVECs and was expressed in cytoplasm upon TNF $\alpha$  challenge.  
367 These result suggested TRIM47-mediated endothelial activation may depend on its cytoplasm  
368 location, although its role in nucleus remain unclear.

369 Different from the anti-inflammatory effect of TRIM65, another constitutive expressed  
370 protein in endothelial cells<sup>23</sup>, TRIM47 promotes inflammatory response both *in vitro* and *in*  
371 *vivo*. The *in vivo* results further confirmed that the pro-inflammatory phenotype primarily  
372 depend on endothelial activation rather than macrophages. Since the previous GWAS results  
373 suggested that both TRIM47 and TRIM65 contribute to the cerebral vessels injury<sup>22</sup>, we may  
374 suppose that TRIM47 and TRIM65 are critically involved in the regulation of endothelial  
375 inflammation and injury by different mechanisms.

376 Proteins covalently modified with K48-linked poly-ubiquitin are targeted for proteasomal  
377 degradation, whereas proteins covalently modified with K63-linked poly-ubiquitin generally  
378 become functionally activated<sup>9</sup>. Recent work showed that TRIM proteins positively or  
379 negatively mediate NF- $\kappa$ B activation primary through K48- or K63-linked poly-ubiquitin.  
380 For example, TRIM5 interacts with TAK1-containing kinase complex and positively regulate  
381 NF- $\kappa$ B activation by mediating K63 poly-ubiquitin chain synthesis<sup>12</sup>. TRIM25 promote  
382 NF- $\kappa$ B activation by enhancing the K63-linked ubiquitination of TRAF2 and bridging the  
383 interaction of TRAF2 and TAK1 or IKK $\beta$ <sup>28</sup>. TRIM14 enhances NF- $\kappa$ B activation in  
384 endothelial cells via directly binding to NEMO and promotes the phosphorylation of I $\kappa$ B $\alpha$   
385 and p65, which is dependent on its K63-linked ubiquitination<sup>30</sup>. TRIM47 is structurally  
386 similar to TRIM25, with a Ring-finger domain, a B2 box and its associated coil-coiled region  
387 at the N terminus, and a PRY domain at the C terminus<sup>8</sup>. Functionally like TRIM25,  
388 TRIM47 also interacts with TRAF2 and promotes MAPK and NF- $\kappa$ B activation through  
389 K63-linked ubiquitination. These findings provide the underlying mechanisms by which  
390 TRIM47 specifically meditates endothelial activation (Fig. 7).

391 To sum up, we identified a novel endothelial activation factor TRIM47, which mediates  
392 inflammatory response in endothelial cells and promote inflammation and tissue damage  
393 during ALI through endothelial TRAF2-MAPK/NF- $\kappa$ B pro-inflammatory axis. Currently  
394 there remain no compounds targeting TRIM proteins at the laboratory or clinical level but it

395 is important to develop inhibitors of TRIM proteins for their use as a therapeutic tools in  
396 multiple diseases <sup>8</sup>. TRIM47 would be an attractive drug target for endothelial inflammation  
397 and ALI. Further detailed analysis of TRIM47 is needed for its use for effective therapy and  
398 to eliminate side effects.

399

#### 400 **Acknowledgement**

401 This work was supported by the National Natural Science Foundation of China (82070080  
402 and 81860020 to YQ, 81873659 to HBX, and 81760140 and 81970256 to KYD), Foundation  
403 for the National Institutes of Health (1R15AI138116 to M.F), and the financial support  
404 provided by China Scholarship Council (201906825031 to YQ).

405

#### 406 **CRedit authorship contribution statement**

407 Yisong Qian, Ziwei Wang, Hongru Lin, Tianhua Lei, Zhou Zhou, Weilu Huang, Xuehan Wu,  
408 Li Zuo, Jie Wu, Yu Liu: Investigation, Methodology. Ling-Fang Wang, Xiao-Hui Guan and  
409 Ke-Yu Deng: Resources. Yisong Qian: Writing -original draft, Conceptualization,  
410 Supervision. Mingui Fu and Hong-Bo Xin: Conceptualization, Supervision, Writing -review  
411 & editing.

412

#### 413 **Declaration of competing interest**

414 The authors declare that they have no known competing financial interests or personal  
415 relationships that could have appeared to influence the work reported in this paper.

416

#### 417 **References**

- 418 1. Maniatis NA, Kotanidou A, Catravas JD, Orfanos SE. Endothelial pathomechanisms in  
419 acute lung injury. *Vascular pharmacology*. Oct-Dec 2008;49(4-6):119-33.  
420 doi:10.1016/j.vph.2008.06.009
- 421 2. Tisoncik JR, Korth MJ, Simmons CP, Farrar J, Martin TR, Katze MG. Into the eye of the  
422 cytokine storm. *Microbiology and molecular biology reviews : MMBR*. Mar  
423 2012;76(1):16-32. doi:10.1128/MMBR.05015-11
- 424 3. Orfanos SE, Mavrommati I, Korovesi I, Roussos C. Pulmonary endothelium in acute  
425 lung injury: from basic science to the critically ill. *Intensive care medicine*. Sep  
426 2004;30(9):1702-14. doi:10.1007/s00134-004-2370-x
- 427 4. Vallet B. Bench-to-bedside review: endothelial cell dysfunction in severe sepsis: a role in  
428 organ dysfunction? *Critical care*. Apr 2003;7(2):130-8. doi:10.1186/cc1864
- 429 5. Ince C, Mayeux PR, Nguyen T, et al. The Endothelium in Sepsis. *Shock*. Mar  
430 2016;45(3):259-70. doi:10.1097/SHK.0000000000000473
- 431 6. Gleeson EM, O'Donnell JS, Preston RJ. The endothelial cell protein C receptor: cell  
432 surface conductor of cytoprotective coagulation factor signaling. *Cell Mol Life Sci*. Mar  
433 2012;69(5):717-26. doi:10.1007/s00018-011-0825-0
- 434 7. Aird WC. The role of the endothelium in severe sepsis and multiple organ dysfunction  
435 syndrome. *Blood*. May 15 2003;101(10):3765-77. doi:10.1182/blood-2002-06-1887
- 436 8. Hatakeyama S. TRIM Family Proteins: Roles in Autophagy, Immunity, and  
437 Carcinogenesis. *Trends in biochemical sciences*. Apr 2017;42(4):297-311.  
438 doi:10.1016/j.tibs.2017.01.002

- 439 9. Versteeg GA, Benke S, Garcia-Sastre A, Rajsbaum R. InTRIMsic immunity: Positive and  
440 negative regulation of immune signaling by tripartite motif proteins. *Cytokine Growth Factor*  
441 *Rev.* Oct 2014;25(5):563-76. doi:10.1016/j.cytogfr.2014.08.001
- 442 10. Hoffpauir CT, Bell SL, West KO, et al. TRIM14 Is a Key Regulator of the Type I IFN  
443 Response during Mycobacterium tuberculosis Infection. *J Immunol.* Jul 1  
444 2020;205(1):153-167. doi:10.4049/jimmunol.1901511
- 445 11. Maarifi G, Smith N, Maillet S, et al. TRIM8 is required for virus-induced IFN response  
446 in human plasmacytoid dendritic cells. *Sci Adv.* Nov 2019;5(11):eaax3511.  
447 doi:10.1126/sciadv.aax3511
- 448 12. Pertel T, Hausmann S, Morger D, et al. TRIM5 is an innate immune sensor for the  
449 retrovirus capsid lattice. *Nature.* Apr 21 2011;472(7343):361-5. doi:10.1038/nature09976
- 450 13. Yu T, Kuang H, Chen J, et al. Tripartite-motif family protein 35-28 regulates microglia  
451 development by preventing necrotic death of microglial precursors in zebrafish. *J Biol Chem.*  
452 Jun 26 2020;295(26):8846-8856. doi:10.1074/jbc.RA119.012043
- 453 14. Zhao W, Wang L, Zhang M, Yuan C, Gao C. E3 ubiquitin ligase tripartite motif 38  
454 negatively regulates TLR-mediated immune responses by proteasomal degradation of TNF  
455 receptor-associated factor 6 in macrophages. *J Immunol.* Mar 15 2012;188(6):2567-74.  
456 doi:10.4049/jimmunol.1103255
- 457 15. Wang Y, Li J, Huang Y, et al. Tripartite motif-containing 28 bridges endothelial  
458 inflammation and angiogenic activity by retaining expression of TNFR-1 and -2 and  
459 VEGFR2 in endothelial cells. *FASEB journal : official publication of the Federation of*  
460 *American Societies for Experimental Biology.* May 2017;31(5):2026-2036.  
461 doi:10.1096/fj.201600988RR
- 462 16. Vandeputte DA, Meije CB, van Dartel M, et al. GOA, a novel gene encoding a ring  
463 finger B-box coiled-coil protein, is overexpressed in astrocytoma. *Biochemical and*  
464 *biophysical research communications.* Aug 24 2001;286(3):574-9.  
465 doi:10.1006/bbrc.2001.5431
- 466 17. Wang Y, Liu C, Xie Z, Lu H. Knockdown of TRIM47 inhibits breast cancer  
467 tumorigenesis and progression through the inactivation of PI3K/Akt pathway.  
468 *Chemico-biological interactions.* Feb 1 2020;317:108960. doi:10.1016/j.cbi.2020.108960
- 469 18. Liang Q, Tang C, Tang M, Zhang Q, Gao Y, Ge Z. TRIM47 is up-regulated in colorectal  
470 cancer, promoting ubiquitination and degradation of SMAD4. *Journal of experimental &*  
471 *clinical cancer research : CR.* Apr 12 2019;38(1):159. doi:10.1186/s13046-019-1143-x
- 472 19. Han Y, Tian H, Chen P, Lin Q. TRIM47 overexpression is a poor prognostic factor and  
473 contributes to carcinogenesis in non-small cell lung carcinoma. *Oncotarget.* Apr 4  
474 2017;8(14):22730-22740. doi:10.18632/oncotarget.15188
- 475 20. Wang Y, Kuang M, Lu Y, Lin L, Liu X. Characterization and biological function analysis  
476 of the TRIM47 gene from common carp (*Cyprinus carpio*). *Gene.* Sep 5 2017;627:188-193.  
477 doi:10.1016/j.gene.2017.06.017
- 478 21. Hao MQ, Xie LJ, Leng W, Xue RW. Trim47 is a critical regulator of cerebral  
479 ischemia-reperfusion injury through regulating apoptosis and inflammation. *Biochemical and*  
480 *biophysical research communications.* Aug 6 2019;515(4):651-657.  
481 doi:10.1016/j.bbrc.2019.05.065
- 482 22. Fornage M, Debette S, Bis JC, et al. Genome-wide association studies of cerebral white

- 483 matter lesion burden: the CHARGE consortium. *Ann Neurol.* Jun 2011;69(6):928-39.  
484 doi:10.1002/ana.22403
- 485 23. Li Y, Huang X, Guo F, et al. TRIM65 E3 ligase targets VCAM-1 degradation to limit  
486 LPS-induced lung inflammation. *Journal of molecular cell biology.* Apr 24  
487 2020;12(3):190-201. doi:10.1093/jmcb/mjz077
- 488 24. Liang J, Saad Y, Lei T, et al. MCP-induced protein 1 deubiquitinates TRAF proteins and  
489 negatively regulates JNK and NF-kappaB signaling. *J Exp Med.* Dec 20  
490 2010;207(13):2959-73. doi:10.1084/jem.20092641
- 491 25. van Gent M, Sparrer KMJ, Gack MU. TRIM Proteins and Their Roles in Antiviral Host  
492 Defenses. *Annu Rev Virol.* Sep 29 2018;5(1):385-405.  
493 doi:10.1146/annurev-virology-092917-043323
- 494 26. Park ES, Choi S, Shin B, et al. Tumor necrosis factor (TNF) receptor-associated factor  
495 (TRAF)-interacting protein (TRIP) negatively regulates the TRAF2 ubiquitin-dependent  
496 pathway by suppressing the TRAF2-sphingosine 1-phosphate (S1P) interaction. *J Biol Chem.*  
497 Apr 10 2015;290(15):9660-73. doi:10.1074/jbc.M114.609685
- 498 27. Xing Y, Yao X, Li H, et al. Cutting Edge: TRAF6 Mediates TLR/IL-1R  
499 Signaling-Induced Nontranscriptional Priming of the NLRP3 Inflammasome. *J Immunol.* Sep  
500 1 2017;199(5):1561-1566. doi:10.4049/jimmunol.1700175
- 501 28. Liu Y, Liu K, Huang Y, et al. TRIM25 Promotes TNF-alpha-Induced NF-kappaB  
502 Activation through Potentiating the K63-Linked Ubiquitination of TRAF2. *J Immunol.* Mar  
503 15 2020;204(6):1499-1507. doi:10.4049/jimmunol.1900482
- 504 29. Jiang MX, Hong X, Liao BB, et al. Expression profiling of TRIM protein family in  
505 THP1-derived macrophages following TLR stimulation. *Sci Rep.* Feb 17 2017;7:42781.  
506 doi:10.1038/srep42781
- 507 30. Huang X, Li Y, Li X, Fan D, Xin HB, Fu M. TRIM14 promotes endothelial activation via  
508 activating NF-kappaB signaling pathway. *Journal of molecular cell biology.* Apr 24  
509 2020;12(3):176-189. doi:10.1093/jmcb/mjz040
- 510  
511

512 **Figure legends**

513 **Fig. 1 TRIM47 is highly expressed in vascular endothelial cells.** (A) The mRNA levels of  
514 TRIM47 in various tissues of mice were detected by real-time PCR and visualized by agarose  
515 gel electrophoresis. (B) The protein levels of TRIM47 were detected in various tissues of  
516 mice by western blot. (C) The immunohistochemistry showed positive staining of TRIM47 in  
517 the vascular lining of multiple tissues. (D) TRIM47 mRNA expression in different cells  
518 detected by real-time PCR. (E) The protein levels of TRIM47 in different cells detected by  
519 western blot. (F) The mRNA levels of 56 TRIM family members in HUVECs and  
520 hCMEC/D3 detected by real-time PCR.

521

522 **Fig. 2 TRIM47 is induced by inflammatory stimulation in endothelial cells.** TRIM47  
523 mRNA and protein levels in HUVECs after (A) LPS, (B) H<sub>2</sub>O<sub>2</sub> and (C) TNF $\alpha$  stimulation  
524 were examined by real-time PCR and western blot, respectively. (D) The translocation of  
525 TRIM47 following TNF $\alpha$  treatment was measured by western blot in cytosolic and nuclear  
526 fractions. (E) The distribution of TRIM47 in HUVECs was detected by  
527 immunocytochemistry in the absence or presence of TNF $\alpha$ .

528

529 **Fig. 3 TRIM47 promotes inflammatory response in endothelial cells.** The mRNA  
530 expression of multiple adhesion molecules and pro-inflammatory cytokines was detected by  
531 real-time PCR in (A) TRIM47 siRNA- and (B) overexpression vector-treated HUVECs.  
532 (C) The protein levels of ICAM-1 and VCAM-1 were measured by western blot in TRIM47  
533 siRNA- and overexpression vector-treated HUVECs. (D) TRIM47 siRNA or expression  
534 vector was transfected into HUVECs, and the transfected cells were incubated with TNF- $\alpha$  or  
535 PBS for 8 h and then co-cultured with Zombie-labeled THP-1 cells for 1 h. The adhesion  
536 of THP-1 was observed under a fluorescence microscope. The contents of (E) IL-1 $\beta$  and (F)  
537 IL-6 in siRNA-treated cells, and (G) IL-1 $\beta$  and (H) IL-6 in overexpression vector-treated  
538 cells were measured by ELISA.

539

540 **Fig. 4 TRIM47 modulates endothelial activation through NF- $\kappa$ B and MAPK signaling**  
541 **pathway.** The activation of NF- $\kappa$ B was detected by western blot in (A) TRIM47 siRNA- and  
542 (B) overexpression vector-treated HUVECs. The activation of MAPK, including ERK, JNK  
543 and p38 signaling pathways was detected by western blot in (C) TRIM47 siRNA- and (D)  
544 overexpression vector-treated HUVECs.

545

546 **Fig. 5 TRIM47 mediates K63-linked Ubiquitylation and interacts with TRAF2.** (A)  
547 HUVECs were treated with 10 ng/ml TNF- $\alpha$  for 0 and 15 min. Cell lysates then were  
548 immunoprecipitated using TRIM47 antibody, followed by western blot analysis using the  
549 indicated antibodies. (B) HUVECs were transiently transfected with empty vector or TRIM47  
550 plasmid for 48 h. Whole-cell lysates were immunoprecipitated with Flag antibody and the  
551 precipitates were immunoblotted with Ub, TRAF2, TRAF5, TAK1, IKK $\gamma$ , and I $\kappa$ B $\alpha$   
552 antibodies.

553

554 **Fig. 6 TRIM47 deficiency reduces endotoxemia-induced acute lung injury and**  
555 **pulmonary inflammation in mice.** (A) Schematic strategy of generation of TRIM47

556 knockout mice. (B) Genotyping of TRIM47<sup>+/+</sup>, TRIM47<sup>+/-</sup>, and TRIM47<sup>-/-</sup> mice. (C) Western  
557 blot analysis for TRIM47 in lungs from TRIM47<sup>+/+</sup> and TRIM47<sup>-/-</sup> mice. (D) Pulmonary  
558 edema was represented as lung wet-to-dry ratio. (E) Survival rate of mice challenged with 15  
559 mg/kg LPS (i.p.). (F) The histological changes in lungs after LPS challenge were examined  
560 by HE staining. (G) The mRNA levels of TRIM47 and various pro-inflammatory cytokines in  
561 the lung were measured by real-time PCR. (F) The content of IL-1 $\beta$ , IL-6 and TNF $\alpha$  in the  
562 serum was assayed by ELISA.

563

564 **Fig.7 The schematic diagram of the mechanism by which TRIM47 promotes**  
565 **TNF $\alpha$ -induced endothelial inflammation and acute lung injury.**

**A**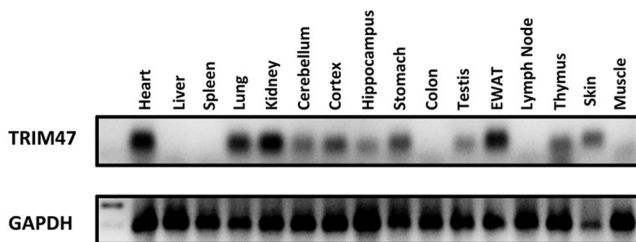**B**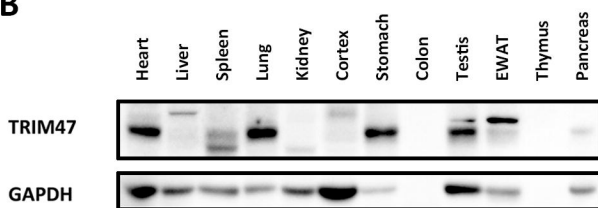**C**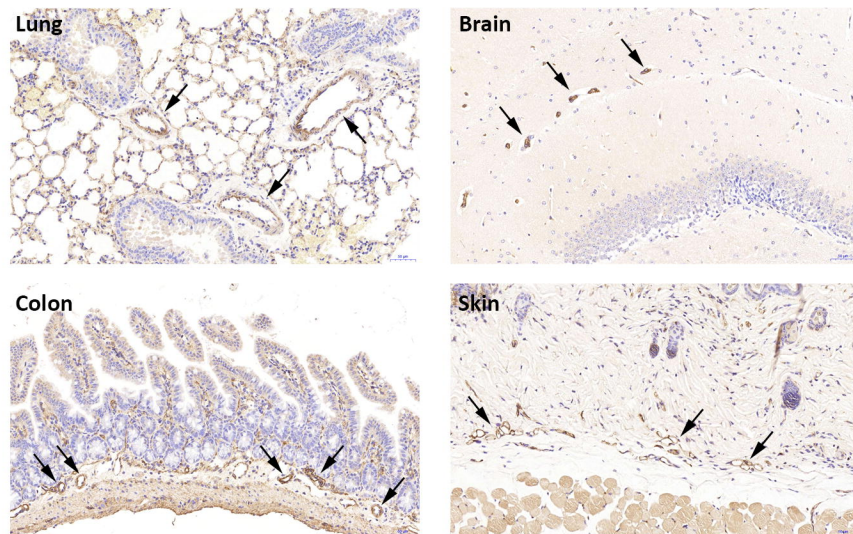**D**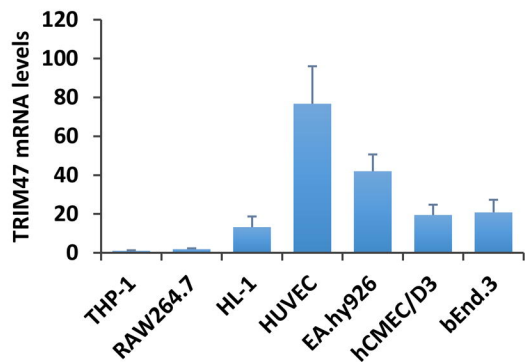**E**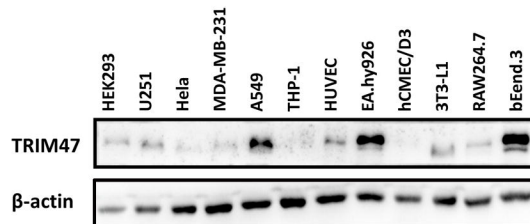**F**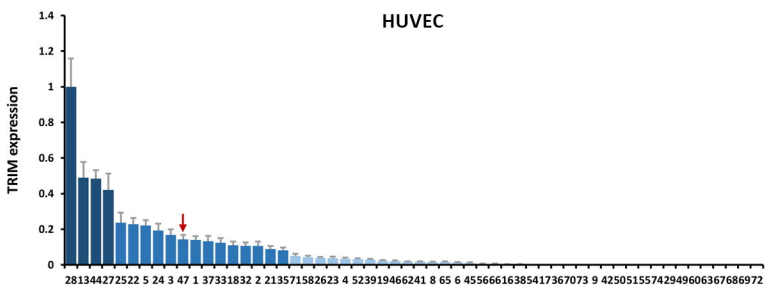**G**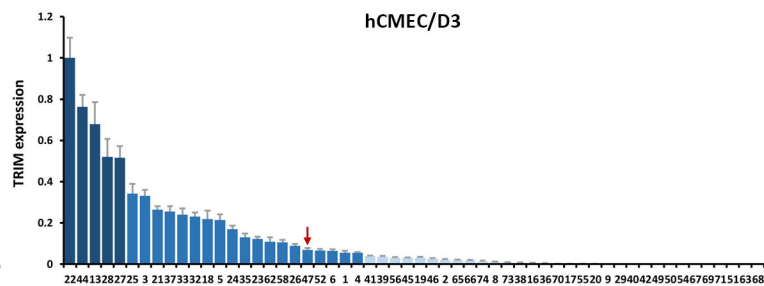



**A**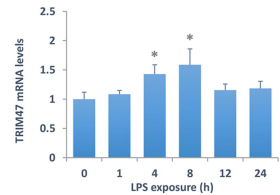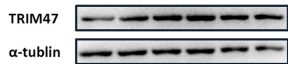**B**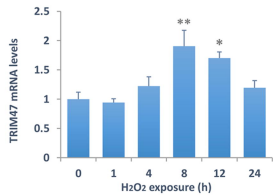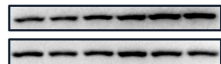**E**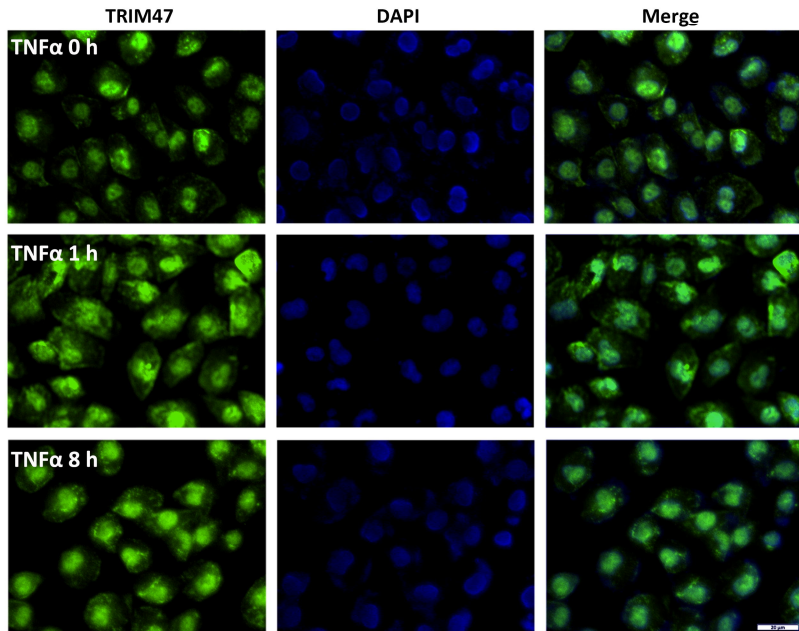**C**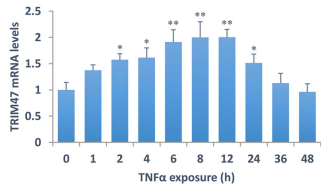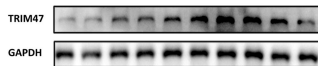**D**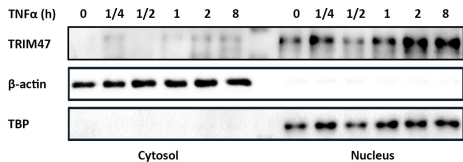

**A**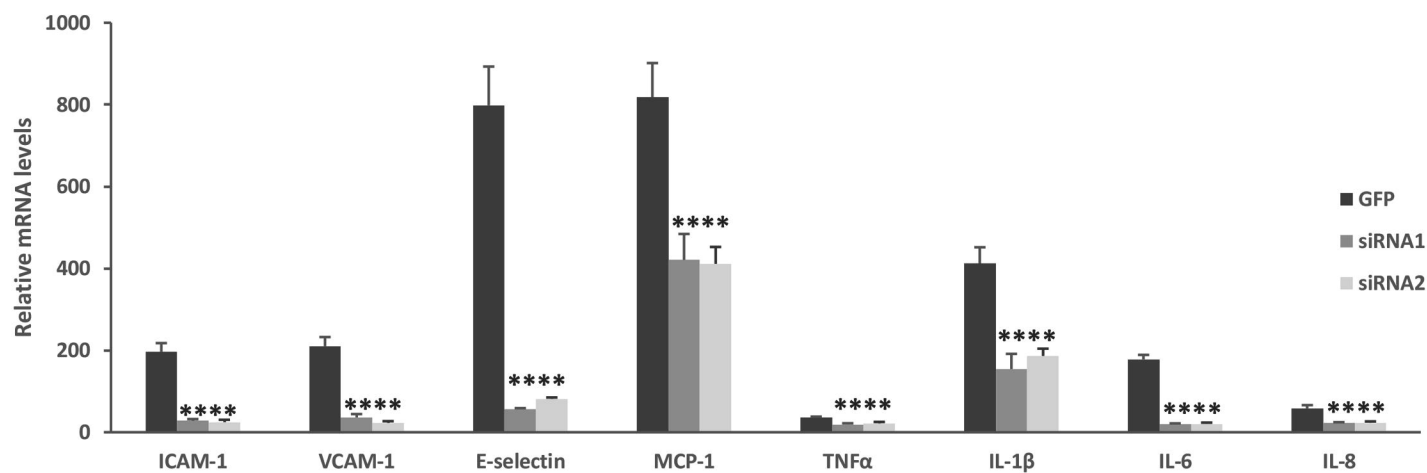**B**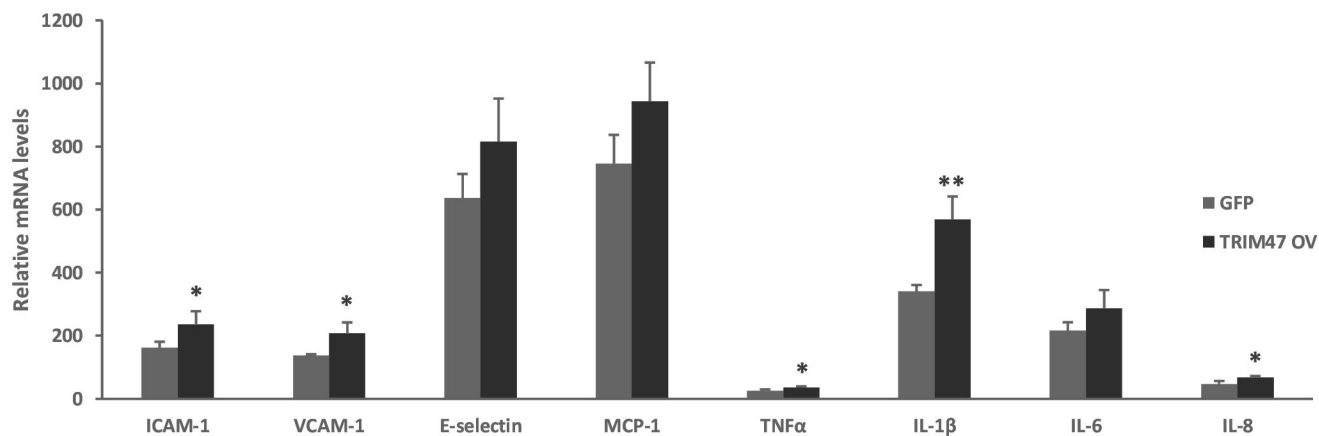**C**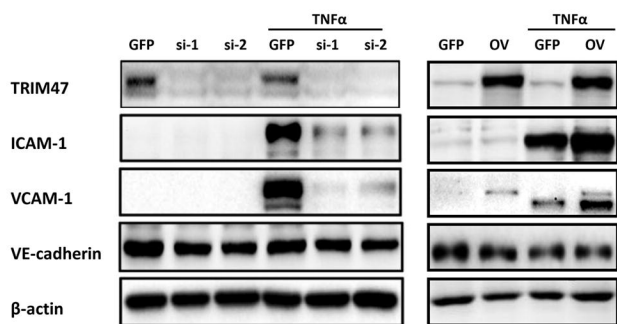**D**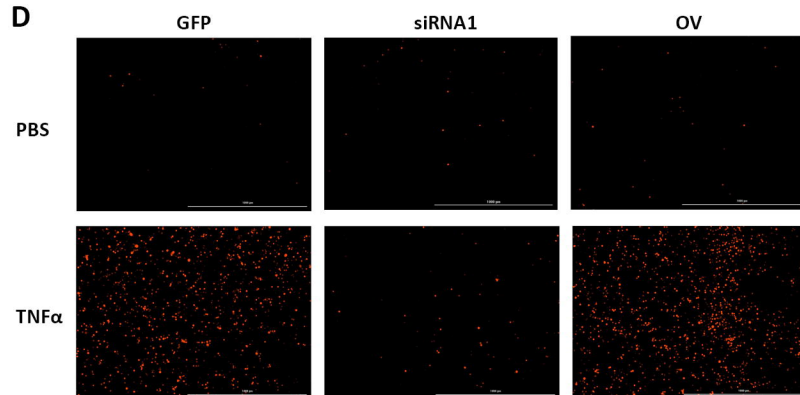**E**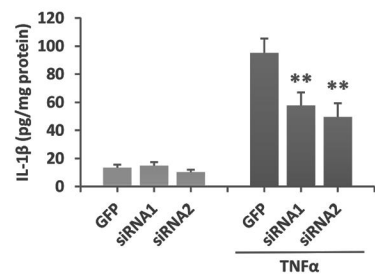**F**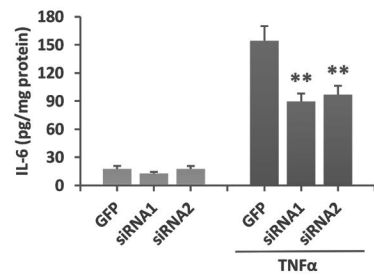**G**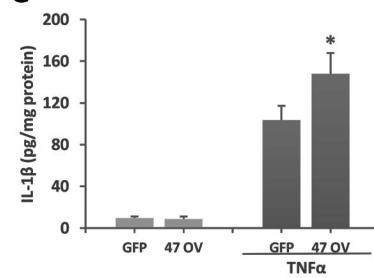**H**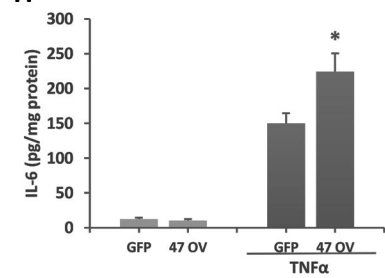

**A**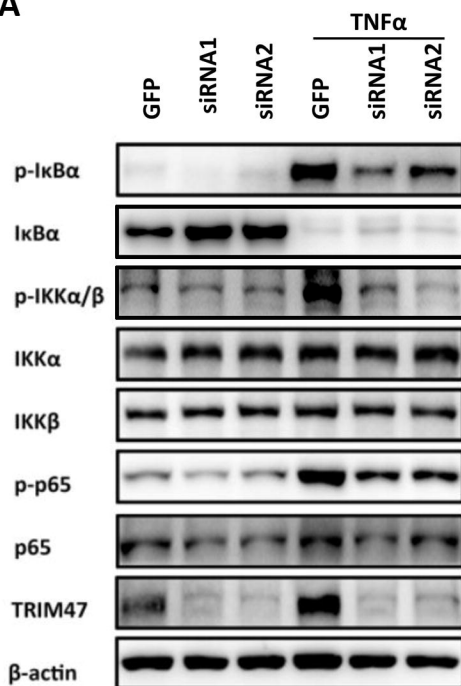**B**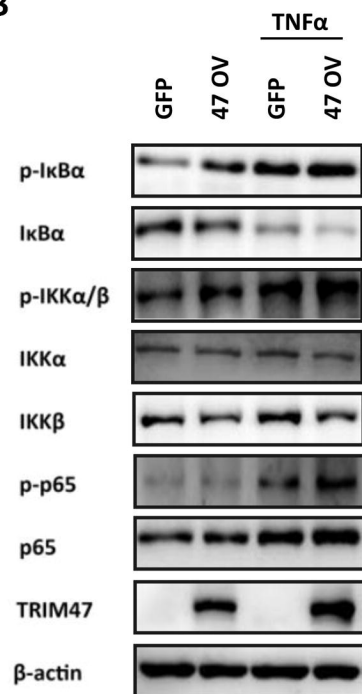**C**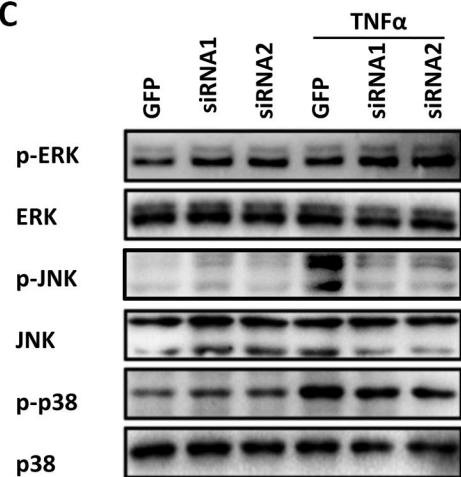**D**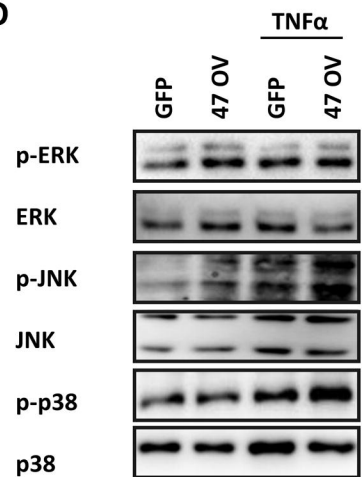

A

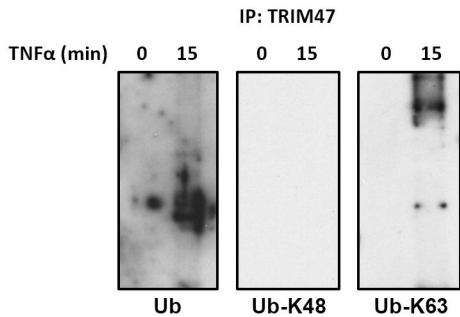

B

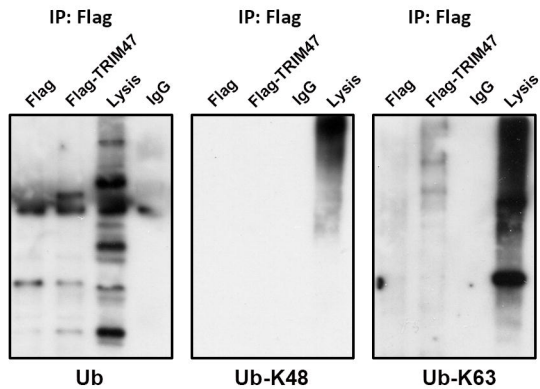

C

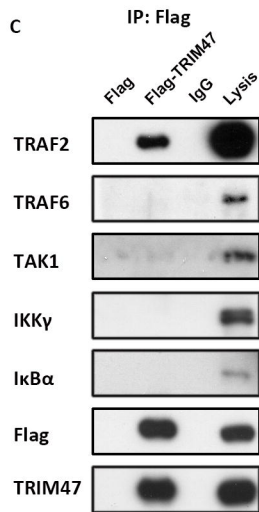

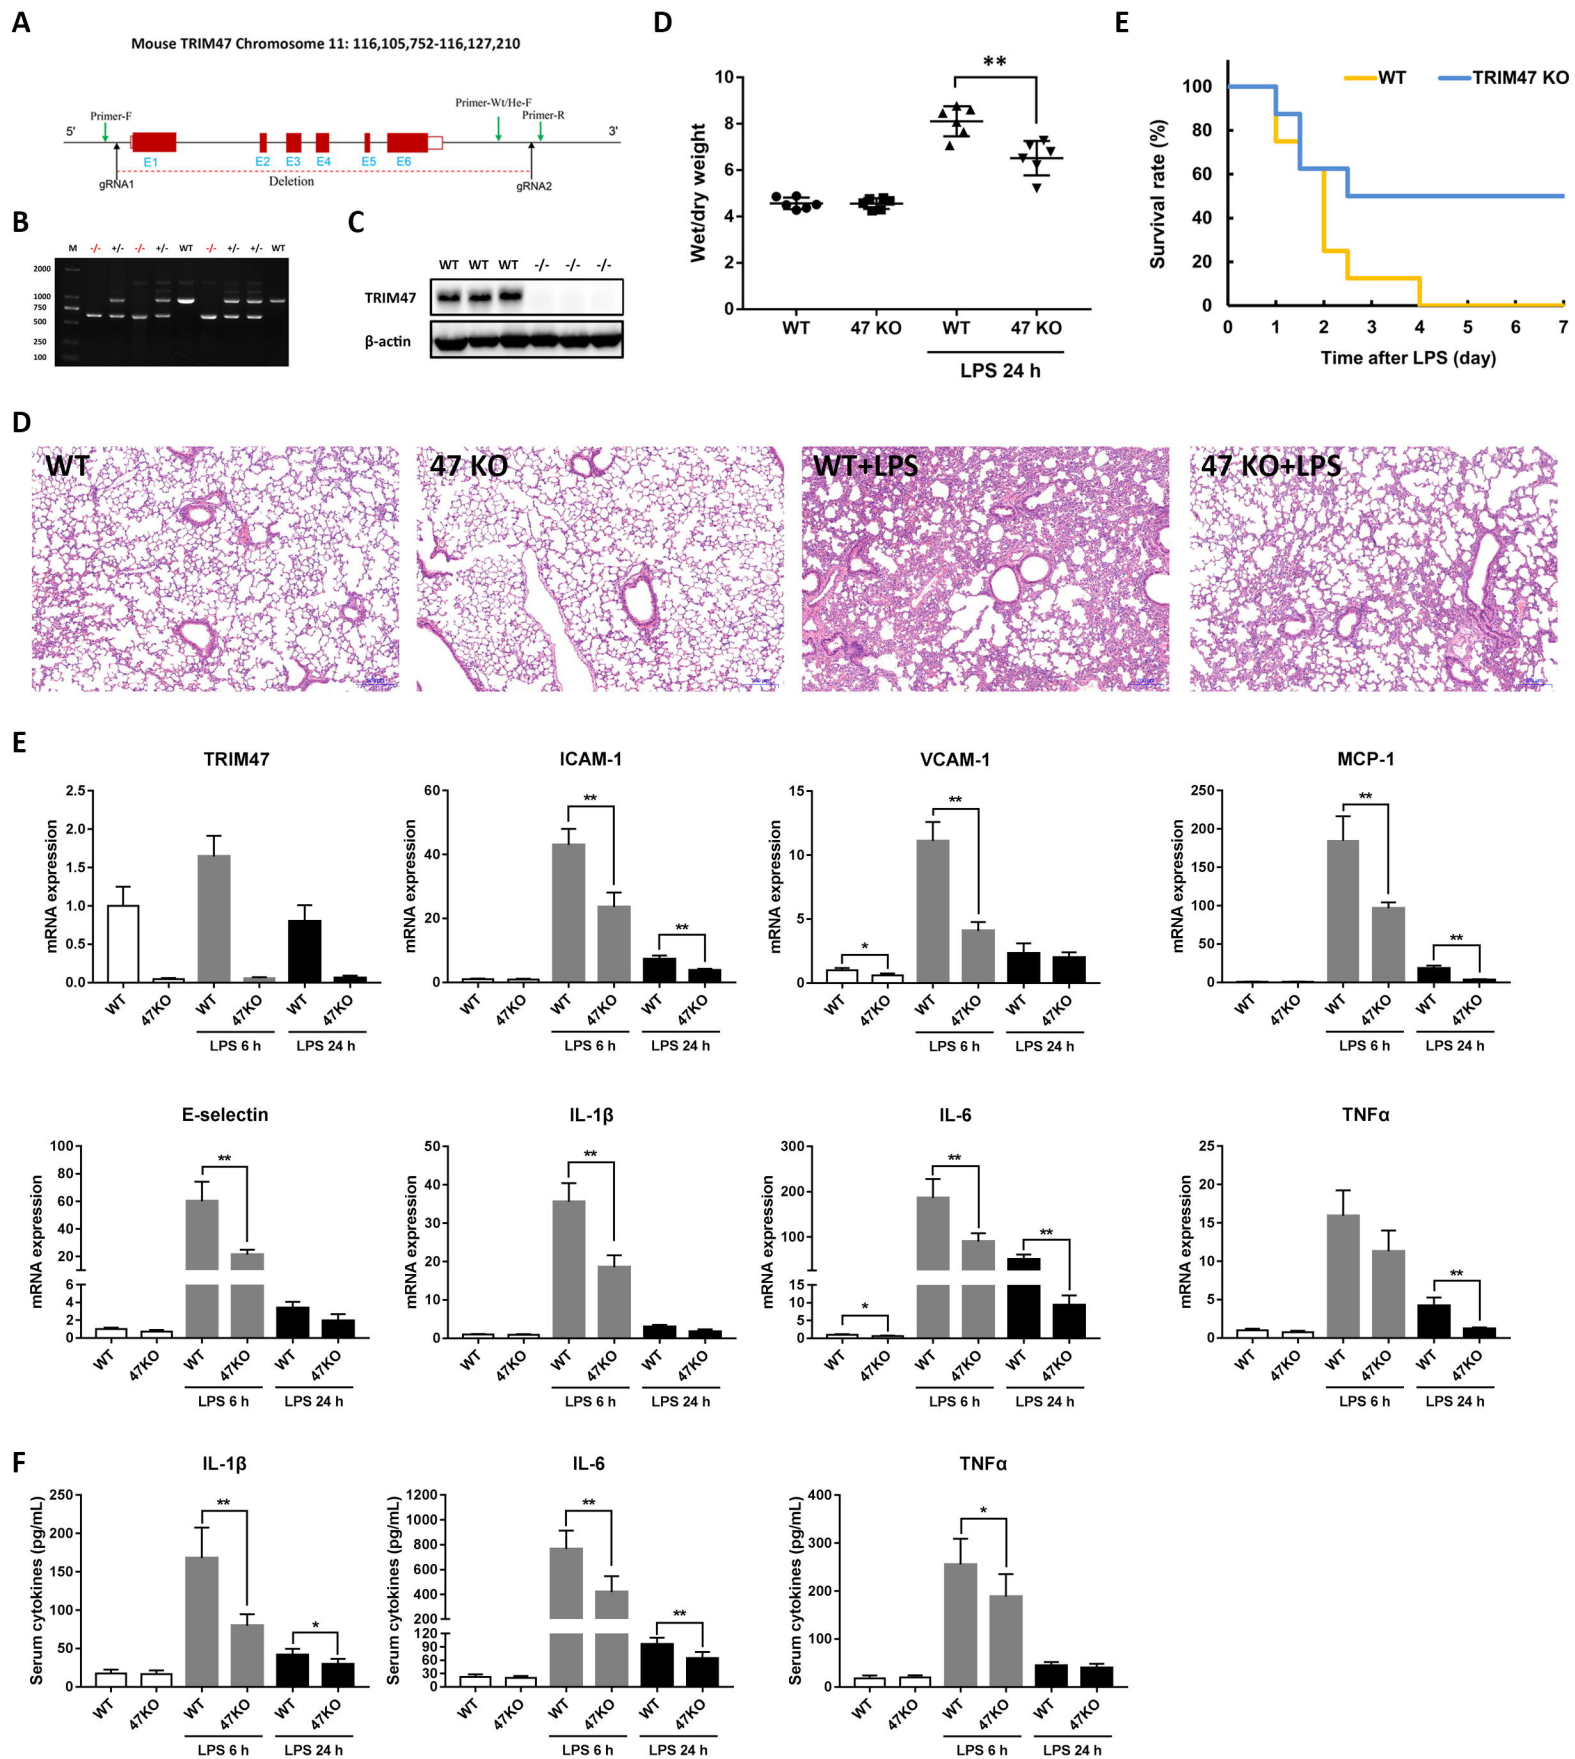

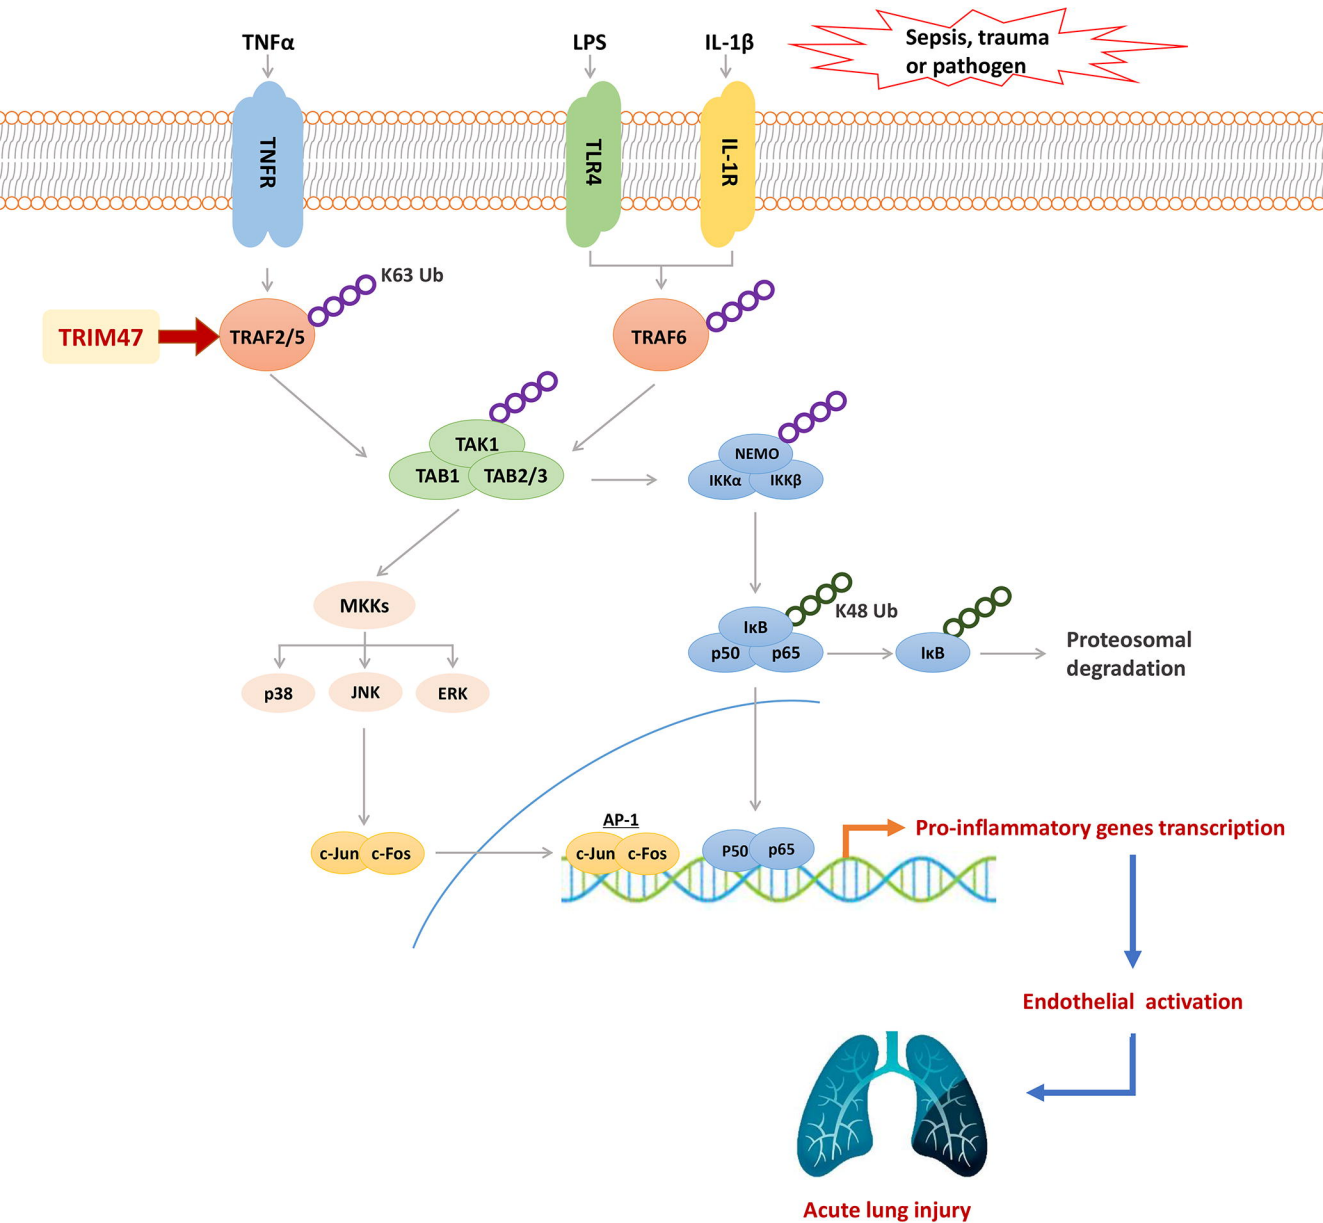

Source: https://www.biorxiv.org/content/10.1101/2021.09.15.460553v1.full.pdf
